# Supplementary material for: Antenna-Biased Odorant Receptor PstrOR17 Mediates Attraction of Phyllotreta striolata to (S)-Cis-Verbenol and (−)-Verbenone
Source: MDPI journal article supplement (doi:10.3390/ijms25084362), 2024-04-15
Supplement: s1 [file s1]

**Table S1.** Compounds used in this study.

| Chemical name                  | CAS        | Chemical name           | CAS        |
|--------------------------------|------------|-------------------------|------------|
| $\beta$ -Citronellol           | 106-22-9   | 2-Pentadecanone         | 2345-28-0  |
| 2-Phenylethanol                | 60-18-2    | Acetophenone            | 98-86-2    |
| Geraniol                       | 106-24-1   | $\beta$ -Ionone         | 79-77-6    |
| Nerol                          | 106-25-2   | ( $\pm$ )-Camphor       | 76-22-2    |
| 1-Hexanol                      | 111-27-3   | 2-Heptanone             | 110-43-0   |
| 1-Heptanol                     | 111-70-6   | $\beta$ -Caryophyllene  | 87-44-5    |
| 1-Nonanol                      | 143-08-8   | (-)-Caryophyllene oxide | 1139-30-6  |
| (S)-cis-Verbenol               | 18881-04-4 | Myrcene                 | 123-35-3   |
| Farnesol                       | 4602-84-0  | Limonene                | 138-86-3   |
| (-)-Borneol                    | 464-45-9   | (-)- $\beta$ -Pinene    | 18172-67-3 |
| Nerolidol                      | 7212-44-4  | (E)- $\beta$ -Farnesene | 18794-84-8 |
| (+)-Cedrol                     | 77-53-2    | Camphene                | 79-92-5    |
| 3,7-Dimethyl-3-octanol         | 78-69-3    | $\alpha$ -Pinene        | 80-56-8    |
| Linalool                       | 78-70-6    | (-)-trans-Caryophyllene | 87-44-5    |
| (E)-2-Hexen-1-ol               | 928-95-0   | Cumene                  | 98-82-8    |
| cis-3-Hexen-1-ol               | 928-96-1   | $\gamma$ -Terpinene     | 99-85-4    |
| trans-3-Hexen-1-ol             | 928-97-2   | $\alpha$ -Terpinene     | 99-86-5    |
| ( $\pm$ )- $\alpha$ -Terpineol | 98-55-5    | Hexane                  | 110-54-3   |
| 1-Pentanol                     | 71-41-0    | Nonane                  | 111-84-2   |
| 4-Penten-1-ol                  | 821-09-0   | Decane                  | 124-18-5   |
| cis-2-Penten-1-ol              | 1576-95-0  | Tridecane               | 629-50-5   |
| Benzaldehyde                   | 100-52-7   | Tetradecane             | 629-59-4   |
| Heptanal                       | 111-71-7   | 1,4-Diethylbenzene      | 105-05-5   |
| Phenylacetaldehyde             | 122-78-1   | 2,6-Di-tert-butylphenol | 128-39-2   |
| Octanal                        | 124-13-0   | 1,8-Cineole             | 470-82-6   |
| 1-Nonanal                      | 124-19-6   | (-)-Verbenone           | 1196-01-6  |
| (1R)-(-)-Myrtenal              | 18486-69-6 | Indole                  | 120-72-9   |
| 3-Vinylbenzaldehyde            | 19955-99-8 | 3-Indoleacetonitrile    | 771-51-7   |
| 4-Ethylbenzaldehyde            | 4748-78-1  | 3-Indolemethanol        | 700-06-1   |

|                                 |           |                           |            |
|---------------------------------|-----------|---------------------------|------------|
| Citral                          | 5392-40-5 | Dimethyl Disulfide        | 624-92-0   |
| Hexanal                         | 66-25-1   | Dimethyl Trisulfide       | 3658-80-8  |
| trans-2-Hexen-1-al              | 6728-26-3 | Methyl ITC                | 556-61-6   |
| Methyl phenylacetate            | 101-41-7  | Ethyl ITC                 | 542-85-8   |
| Isobutyl phenylacetate          | 102-13-6  | Propyl ITC                | 628-30-8   |
| Diethyl malonate                | 105-53-3  | Butyl ITC                 | 592-82-5   |
| Ethyl butyrate                  | 105-54-4  | Allyl ITC                 | 57-06-7    |
| Octyl acetate                   | 112-14-1  | 4-Pentenyl ITC            | 18060-79-2 |
| Methyl salicylate               | 119-36-8  | Phenyl ITC                | 103-72-0   |
| Ethyl hexanoate                 | 123-66-0  | Benzyl ITC                | 622-78-6   |
| Benzyl acetate                  | 140-11-4  | 2-Phenylethyl ITC         | 2257-09-2  |
| Neryl acetate                   | 141-12-8  | 4-Methoxyphenyl ITC       | 2284-20-0  |
| Hexyl acetate                   | 142-92-7  | 3-(Methylthio)propyl ITC) | 505-79-3   |
| Nonyl acetate                   | 143-13-5  | sec-Butyl ITC             | 4426-79-3  |
| trans-2-Hexenyl acetate         | 2497-18-9 | 3-Buten-1-yl ITC          | 3386-97-8  |
| cis-3-Hexenyl acetate           | 3681-71-8 | iso-Butyl ITC             | 591-82-2   |
| (±)- $\alpha$ -Terpinyl acetate | 80-26-2   | 3-Methoxyphenyl ITC       | 3125-64-2  |
| Methyl benzoate                 | 93-58-3   | Sulforaphane              | 4478-93-7  |
| 4'-Ethylacetophenone            | 937-30-4  | Sulforaphene              | 592-95-0   |

**Table S2** Primers used in this study.

| Primer name              | Sequence (5'–3')                                  |
|--------------------------|---------------------------------------------------|
| For amplification        |                                                   |
| PstrOR9-F                | ATGGGGGAAATGCGCGATATAAA                           |
| PstrOR9-R                | TTATTTATTCATGCTTATGAGTA                           |
| PstrOR11-F               | ATGACGTCCGAAGGGATTGTGCC                           |
| PstrOR11-R               | CTTTAGTACATTCACTCTTTTAA                           |
| PstrOR17-F               | ATGAAACACCTTCAGATAGCCA                            |
| PstrOR17-R               | CTCAATCGCCTCTTTTGTTATTC                           |
| PstrOR26-F               | ATGGACTTGGTTTATCCGCAACC                           |
| PstrOR26-R               | CTAGTTTTCCAGGTGGTTTCTAA                           |
| PstrOR38-F               | ATGTTCTGCGAGATATTTTCC                             |
| PstrOR38-R               | TCACTTTTCATTATTCACATTGT                           |
| PstrOR59-F               | ATGTCTTCACCCGATAGACCCAG                           |
| PstrOR59-R               | TGATGTCTCTAAACGAACAATAA                           |
| For RT-qPCR analysis     |                                                   |
| PstrOR17-qF <sup>a</sup> | GCCATATCGCAATCAGTT                                |
| PstrOR17-qR <sup>a</sup> | CTCGCATCATTACAATCAATAG                            |
| actin-qF                 | TGTCCCACACTGTACCCATC                              |
| actin-qR                 | CGTGGCCATTTCTGTTC                                 |
| For dsRNA synthesis      |                                                   |
| dsPstrOR17-F             | <u>TAATACGACTCACTATAGGG</u> CAACATCCAACCTGATCGACG |
| dsPstrOR17-R             | <u>TAATACGACTCACTATAGGG</u> TTCGAATTTGACCTGCAAGA  |

<sup>a</sup> Primers referred to by Wu et al.[1]

T7 promoter sequence in the RNAi primers is underlined.

1. Wu, Z.Z.; Bin, S.Y.; He, H.L.; Wang, Z.B. Differential expression analysis of chemoreception genes in the striped slea beetle *Phyllotreta striolata* using a transcriptomic approach. *Plos One* **2016**, *11*, e0153067.

**Figure S1.** Ramachandran plot and statistics of PstrOR17 model analyzed by PROCHECK.

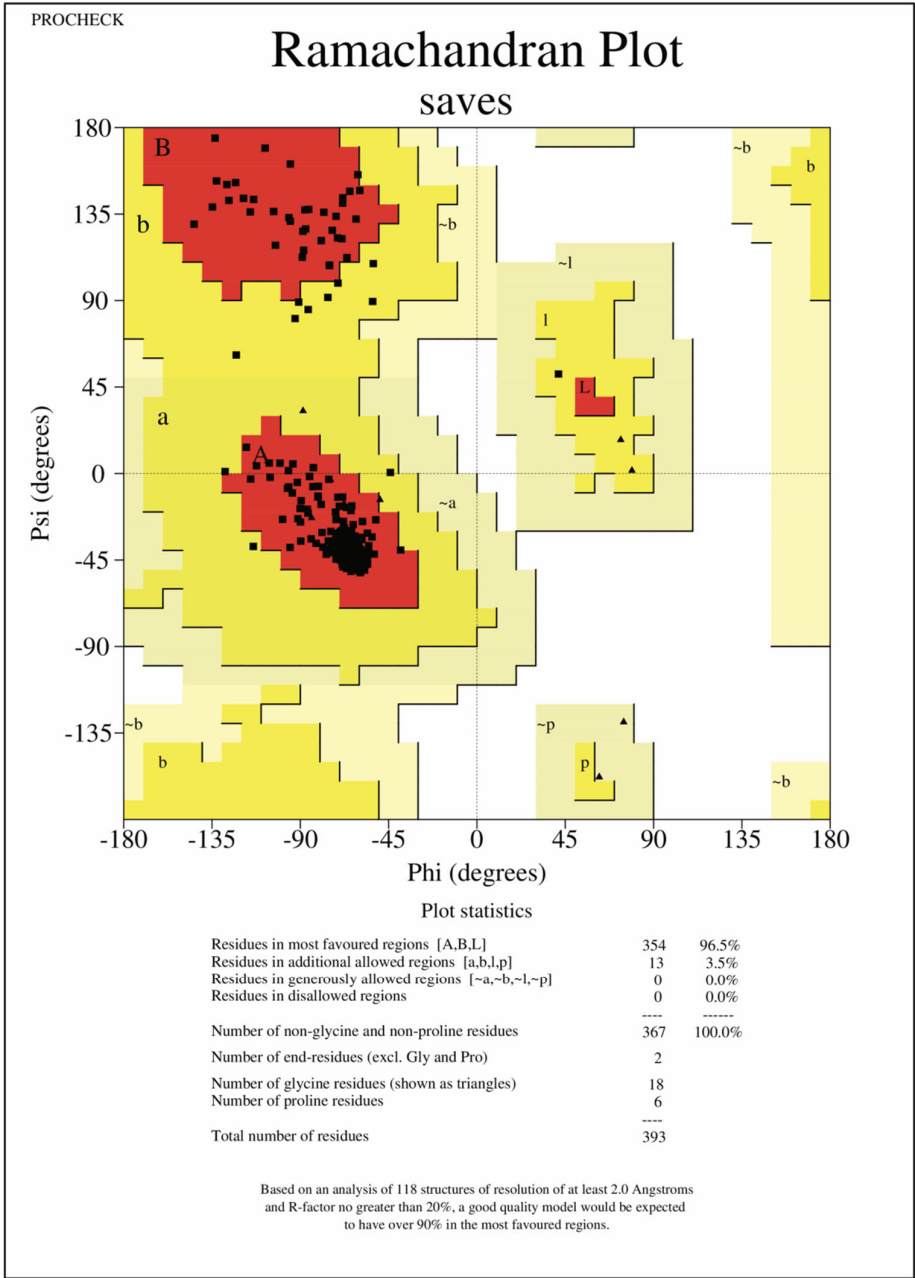

saves\_01.ps
